# Supplementary material for: Mid-Holocene ITCZ migration: impacts on Hadley cell dynamics and terrestrial hydroclimate
Source: Copernicus journal article supplement (doi:10.5194/egusphere-2024-3673), 2024-12-13
Supplement: Supplementary file 1 [file egusphere-2024-3673-supplement.pdf]

# Mid-Holocene ITCZ migration: impacts on Hadley cell dynamics and terrestrial hydroclimate

Jianpu Bian<sup>1</sup>, Jouni Räisänen<sup>1</sup>, and Heikki Seppä<sup>2</sup>

<sup>1</sup>Institute for Atmospheric and Earth System Research, University of Helsinki, Helsinki, Finland

<sup>2</sup>Department of Geosciences and Geography, University of Helsinki, Helsinki, Finland

**Correspondence:** Jianpu Bian (bian.jianpu@helsinki.fi)

**Table S1.** List of the nine PMIP4-CMIP6 models

|   | <b>Model</b>   | <b>Realization</b> | <b>Used years</b> | <b>Model reference</b>   |
|---|----------------|--------------------|-------------------|--------------------------|
| 1 | EC-Earth3-LR   | r1i1p1             | 100               | (Wyser et al., 2020)     |
| 2 | CESM2          | r1i1p1             | 100               | (Gettelman et al., 2019) |
| 3 | IPSL-CM6A-LR   | r1i1p1             | 100               | (Boucher et al., 2020)   |
| 4 | ACCESS-ESM1-5  | r1i1p1             | 100               | (Ziehn et al., 2020)     |
| 5 | AWI-ESM-1-1-LR | r1i1p1             | 100               | (Sidorenko et al., 2015) |
| 6 | GISS-E2-1-G    | r1i1p1             | 100               | (Kelley et al., 2020)    |
| 7 | MPI-ESM1-2-LR  | r1i1p1             | 100               | (Mauritsen et al., 2019) |
| 8 | MRI-ESM2-0     | r1i1p1             | 100               | (Yukimoto et al., 2019)  |
| 9 | NorESM2-LM     | r1i1p1             | 100               | (Seland et al., 2020)    |

## Defining ITCZ position metrics

We quantify zonal and annual ITCZ locations by applying two different precipitation metrics (Adam et al., 2016; Bian and Räisänen, 2024).

The first metric is the precipitation centroid for ITCZ location, denoted as

$$5 \quad \phi_{ITCZ} = \frac{\int_{\phi_S}^{\phi_N} \phi [\overline{P}(\phi) \cos \phi]^X d\phi}{\int_{\phi_S}^{\phi_N} [\overline{P}(\phi)]^X \cos \phi d\phi} \quad (\text{S1})$$

where  $[\overline{P}(\phi)]$  is the zonal and time mean precipitation. The boundaries  $\phi_S$  and  $\phi_N$  are defined as  $20^\circ S/N$ , and the integer power  $X$  is 1 (Adam et al., 2016).

The second metric locates the ITCZ location where the total area-weighted precipitation between boundaries  $\phi_S$  and  $\phi_N$  are equally divided (Adam et al., 2016; Bian and Räisänen, 2024):

$$10 \quad \int_{\phi_S}^{\phi_{ITCZ}} \overline{P}(\phi) \cos \phi d\phi = \int_{\phi_{ITCZ}}^{\phi_N} \overline{P}(\phi) \cos \phi d\phi \quad (\text{S2})$$

where  $\phi_S$  and  $\phi_N$  have the same definition as the first metric.

**Table S2.** Annual precipitation (unit: mm/year) difference between the MH and PI from the pollen proxy dataset adapted from Herbert and Harrison (2016) and Lowry and McGowan (2024). SE denotes the pooled standard error.

| Latitude(°) | Longitude(°) | MAP      | SE      |
|-------------|--------------|----------|---------|
| -43         | 145          | 33.9     | ±316.12 |
| -43         | 147          | 488.81   | ±400.77 |
| -43         | 149          | 340.52   | ±337.83 |
| -41         | 145          | -192.24  | ±362.11 |
| -41         | 147          | -134.7   | ±351.44 |
| -39         | 141          | -1.39    | ±345.53 |
| -39         | 143          | 127.76   | ±320.8  |
| -39         | 145          | -34.94   | ±332.51 |
| -39         | 147          | 648.35   | ±589.47 |
| -37         | 141          | 344.4    | ±314.35 |
| -37         | 143          | 435.95   | ±350.25 |
| -37         | 145          | 733.33   | ±310.24 |
| -37         | 147          | 347.46   | ±387.13 |
| -37         | 149          | 236.91   | ±338.02 |
| -37         | 151          | -118.95  | ±294.92 |
| -35         | 115          | 94.1     | ±405.65 |
| -35         | 117          | 360.51   | ±361.18 |
| -35         | 119          | 145.4    | ±315.22 |
| -35         | 139          | 337.95   | ±409.06 |
| -35         | 143          | -6.69    | ±294.87 |
| -35         | 149          | 218.66   | ±346.99 |
| -35         | 151          | 92.32    | ±304.07 |
| -33         | 115          | 149.26   | ±354.93 |
| -33         | 141          | 350.91   | ±300.04 |
| -33         | 151          | 329.92   | ±315.23 |
| -31         | 115          | 974.56   | ±323.65 |
| -31         | 127          | 366.88   | ±330.12 |
| -31         | 139          | 227.16   | ±334.44 |
| -31         | 143          | 9.63     | ±295.29 |
| -31         | 151          | 529.72   | ±328.49 |
| -27         | 153          | -100.25  | ±412.28 |
| -25         | 153          | -35.77   | ±320.7  |
| -17         | 127          | 105.82   | ±300.74 |
| -17         | 145          | 896.86   | ±476.2  |
| -17         | 147          | -2065.91 | ±630.63 |
| -15         | 127          | 746.57   | ±357.96 |
| -15         | 137          | 298.54   | ±298.73 |
| -15         | 145          | 137.11   | ±319.76 |
| -13         | 137          | 37.03    | ±334.55 |
| -13         | 141          | -789.8   | ±330.85 |
| -13         | 143          | 8.88     | ±363.29 |
| -11         | 143          | -22.07   | ±334.56 |

**Table S3.** Alpha index difference between the MH and PI from the pollen proxy dataset adapted from Herbert and Harrison (2016) and Lowry and McGowan (2024). SE denotes the pooled standard error.

| Latitude(°) | Longitude(°) | Alpha   | SE      |
|-------------|--------------|---------|---------|
| -43         | 145          | 0       | ±0.0971 |
| -43         | 147          | 0.0265  | ±0.102  |
| -43         | 149          | 0.0152  | ±0.1098 |
| -41         | 145          | -0.1337 | ±0.0983 |
| -41         | 147          | -0.1781 | ±0.1527 |
| -39         | 141          | -0.0532 | ±0.1302 |
| -39         | 143          | 0.0414  | ±0.1116 |
| -39         | 145          | -0.0495 | ±0.1451 |
| -39         | 147          | -0.0145 | ±0.1072 |
| -37         | 141          | 0.2339  | ±0.1195 |
| -37         | 143          | 0.0931  | ±0.14   |
| -37         | 145          | 0.2544  | ±0.1102 |
| -37         | 147          | 0.065   | ±0.129  |
| -37         | 149          | -0.017  | ±0.1211 |
| -37         | 151          | -0.1508 | ±0.0984 |
| -35         | 115          | 0.1778  | ±0.1646 |
| -35         | 117          | 0.2084  | ±0.1407 |
| -35         | 119          | 0.1549  | ±0.1452 |
| -35         | 139          | 0.2376  | ±0.1469 |
| -35         | 143          | -0.0034 | ±0.0971 |
| -35         | 149          | -0.0315 | ±0.1181 |
| -35         | 151          | 0.0283  | ±0.109  |
| -33         | 115          | 0.1347  | ±0.1438 |
| -33         | 141          | 0.5122  | ±0.1006 |
| -33         | 151          | 0.1332  | ±0.1018 |
| -31         | 115          | 0.3877  | ±0.1244 |
| -31         | 127          | 0.3249  | ±0.1703 |
| -31         | 139          | 0.1824  | ±0.1683 |
| -31         | 143          | 0.0089  | ±0.0987 |
| -31         | 151          | 0.2113  | ±0.1127 |
| -27         | 153          | -0.0817 | ±0.1585 |
| -25         | 153          | 0.0299  | ±0.1049 |
| -17         | 127          | 0.2538  | ±0.1376 |
| -17         | 145          | 0.2457  | ±0.1148 |
| -17         | 147          | -0.2435 | ±0.1209 |
| -15         | 127          | 0.349   | ±0.114  |
| -15         | 137          | 0.3037  | ±0.156  |
| -15         | 145          | 0.0228  | ±0.106  |
| -13         | 137          | 0.0786  | ±0.1244 |
| -13         | 141          | 0.2548  | ±0.1142 |
| -13         | 143          | 0.0401  | ±0.117  |
| -11         | 143          | 0.0486  | ±0.1153 |

## References

- Adam, O., Bischoff, T., and Schneider, T.: Seasonal and interannual variations of the energy flux equator and ITCZ. Part I: Zonally averaged ITCZ position, *Journal of Climate*, 29, 3219–3230, 2016.
- 15 Bian, J. and Räisänen, J.: Mid-holocene changes in the global ITCZ: meridional structure and land–sea rainfall differences, *Climate Dynamics*, pp. 1–19, 2024.
- Boucher, O., Servonnat, J., Albright, A. L., Aumont, O., Balkanski, Y., Bastrikov, V., Bekki, S., Bonnet, R., Bony, S., Bopp, L., et al.: Presentation and evaluation of the IPSL-CM6A-LR climate model, *Journal of Advances in Modeling Earth Systems*, 12, e2019MS002 010, 2020.
- 20 Gettelman, A., Hannay, C., Bacmeister, J. T., Neale, R. B., Pendergrass, A., Danabasoglu, G., Lamarque, J.-F., Fasullo, J., Bailey, D., Lawrence, D., et al.: High climate sensitivity in the Community Earth System Model version 2 (CESM2), *Geophysical Research Letters*, 46, 8329–8337, 2019.
- Herbert, A. V. and Harrison, S. P.: Evaluation of a modern-analogue methodology for reconstructing Australian palaeoclimate from pollen, *Review of Palaeobotany and Palynology*, 226, 65–77, 2016.
- 25 Kelley, M., Schmidt, G. A., Nazarenko, L. S., Bauer, S. E., Ruedy, R., Russell, G. L., Ackerman, A. S., Aleinov, I., Bauer, M., Bleck, R., et al.: GISS-E2. 1: Configurations and climatology, *Journal of Advances in Modeling Earth Systems*, 12, e2019MS002 025, 2020.
- Lowry, A. L. and McGowan, H. A.: Insights into the Australian mid-Holocene climate using downscaled climate models, *Climate of the Past*, 20, 2309–2325, 2024.
- Mauritsen, T., Bader, J., Becker, T., Behrens, J., Bittner, M., Brokopf, R., Brovkin, V., Claussen, M., Crueger, T., Esch, M., et al.: Developments in the MPI-M Earth System Model version 1.2 (MPI-ESM1. 2) and its response to increasing CO<sub>2</sub>, *Journal of Advances in Modeling Earth Systems*, 11, 998–1038, 2019.
- 30 Seland, Ø., Bentsen, M., Olivíe, D., Toniazzo, T., Gjermundsen, A., Graff, L. S., Debernard, J. B., Gupta, A. K., He, Y.-C., Kirkevåg, A., et al.: Overview of the Norwegian Earth System Model (NorESM2) and key climate response of CMIP6 DECK, historical, and scenario simulations, *Geoscientific Model Development*, 13, 6165–6200, 2020.
- 35 Sidorenko, D., Rackow, T., Jung, T., Semmler, T., Barbi, D., Danilov, S., Dethloff, K., Dorn, W., Fieg, K., Gößling, H. F., et al.: Towards multi-resolution global climate modeling with ECHAM6–FESOM. Part I: model formulation and mean climate, *Climate Dynamics*, 44, 757–780, 2015.
- Wyser, K., van Noije, T., Yang, S., von Hardenberg, J., O’Donnell, D., and Döscher, R.: On the increased climate sensitivity in the EC-Earth model from CMIP5 to CMIP6, *Geoscientific Model Development*, 13, 3465–3474, 2020.
- 40 Yukimoto, S., Kawai, H., Koshiro, T., Oshima, N., Yoshida, K., Urakawa, S., Tsujino, H., Deushi, M., Tanaka, T., Hosaka, M., et al.: The Meteorological Research Institute Earth System Model version 2.0, MRI-ESM2. 0: Description and basic evaluation of the physical component, *Journal of the Meteorological Society of Japan. Ser. II*, 97, 931–965, 2019.
- Ziehn, T., Chamberlain, M. A., Law, R. M., Lenton, A., Bodman, R. W., Dix, M., Stevens, L., Wang, Y.-P., and Srbinovsky, J.: The Australian earth system model: ACCESS-ESM1. 5, *Journal of Southern Hemisphere Earth Systems Science*, 70, 193–214, 2020.
